# Supplementary material
Source: MDPI journal article supplement (https://www.mdpi.com/2221-3759/9/4/43)
Supplement: s1 [file s1]

Table S1. (Kim and Orkhon et al)

A

| recombinants |                |                 |                 |                 |                 |                |                 | lethality |
|--------------|----------------|-----------------|-----------------|-----------------|-----------------|----------------|-----------------|-----------|
| +            | +              | th <sup>1</sup> | st <sup>1</sup> | cu <sup>1</sup> | +               | +              | +               | +         |
| +            | +              | th <sup>1</sup> | st <sup>1</sup> | cu <sup>1</sup> | sr <sup>1</sup> | e <sup>s</sup> | +               | +         |
| +            | +              | +               | +               | +               | sr <sup>1</sup> | e <sup>s</sup> | ca <sup>1</sup> | +         |
| +            | +              | +               | +               | cu <sup>1</sup> | sr <sup>1</sup> | e <sup>s</sup> | ca <sup>1</sup> | +         |
| +            | +              | +               | +               | +               | +               | e <sup>s</sup> | ca <sup>1</sup> | +         |
| +            | +              | +               | st <sup>1</sup> | cu <sup>1</sup> | sr <sup>1</sup> | +              | +               | +         |
| +            | +              | th <sup>1</sup> | st <sup>1</sup> | cu <sup>1</sup> | sr <sup>1</sup> | e <sup>s</sup> | +               | +         |
| +            | +              | th <sup>1</sup> | st <sup>1</sup> | +               | +               | +              | +               | +         |
| +            | h <sup>1</sup> | +               | +               | +               | sr <sup>1</sup> | e <sup>s</sup> | ca <sup>1</sup> | -         |
| +            | h <sup>1</sup> | th <sup>1</sup> | st <sup>1</sup> | cu <sup>1</sup> | sr <sup>1</sup> | e <sup>s</sup> | +               | -         |
| +            | h <sup>1</sup> | th <sup>1</sup> | st <sup>1</sup> | cu <sup>1</sup> | sr <sup>1</sup> | +              | +               | -         |
| +            | h <sup>1</sup> | th <sup>1</sup> | st <sup>1</sup> | cu <sup>1</sup> | +               | +              | +               | -         |
| +            | h <sup>1</sup> | +               | +               | +               | +               | +              | +               | -         |
| +            | h <sup>1</sup> | +               | +               | +               | +               | +              | ca <sup>1</sup> | -         |

B

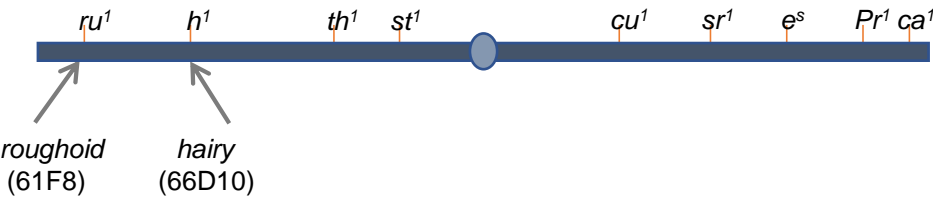

Table S1. Meiotic mapping of the *m115* suppressor

(A, B) multiple recombinants were obtained by crossing *m115* and #576 yielded, and only recombinants that has crossover between *roughoid* (*ru*) and *hairy* (*h*) ( ) contained the lethal site (boxed in A). Therefore, the lethal site of *m115* was mapped in between 64F8-66D10 (B).

Table S2. (Kim and Orkhon et al)

| Cytology    | Symbol   |
|-------------|----------|
| 64B17-64B17 | CR45821  |
| 64B17-64B17 | CR45740  |
| 64B17-64B17 | CR44528  |
| 64B17-64B17 | CG7509   |
| 64B17-64B17 | CG18808  |
| 64B17-64C1  | Dhc64C   |
| 64C1-64C1   | Aats-leu |
| 64C1-64C1   | CG13708  |
| 64C1-64C1   | CG13707  |
| 64C1-64C1   | CG32237  |

**Table S2. Ten potential genes for *m115* identified by deficiency mapping**

Deficiency mapping (Fig. 1A) narrowed down the lethal site to 64B17-64C1, and ten genes present in this region are listed. Among these genes, complementation tests showed that *m115* has a lethal mutation in the *Dhc64C* gene.

Table S3. (Kim and Orkhon et al)

| Gal4 drivers | UAS-Dhc64C RNAi (2 <sup>nd</sup> chr)<br>(NIG #7507R-2) | UAS-Dhc64C RNAi (3rd chr)<br>(BDSC #25791)     |
|--------------|---------------------------------------------------------|------------------------------------------------|
| nub-Gal4     | small larvae, early pupal lethal                        | small larvae, early pupal lethal               |
| ey-Gal4      | embryo to pupal lethal                                  | small larvae, late pupal lethal                |
| en-Gal4      | embryo to 3 <sup>rd</sup> instar larval lethal          | embryo to 1 <sup>st</sup> instar larval lethal |
| ptc-Gal4     | embryo to early pupal lethal                            | early pupal lethal                             |
| 30A-Gal4     | larval to pupal lethal                                  | pupal lethal                                   |

**Table S3. The knockdown phenotypes of the two *Dhc64C* RNAi lines are identical**

Both NIG #7507R-2 and BDSC #28749 lines whose *Dhc64C* RNAi transgenes are inserted in the second and the third chromosome, respectively, induce similar phenotypes at 25°C. Their binding sites in *Dhc64C* transcripts are marked in Fig. 1B.

Fig S1. (Kim and Orkhon et al)

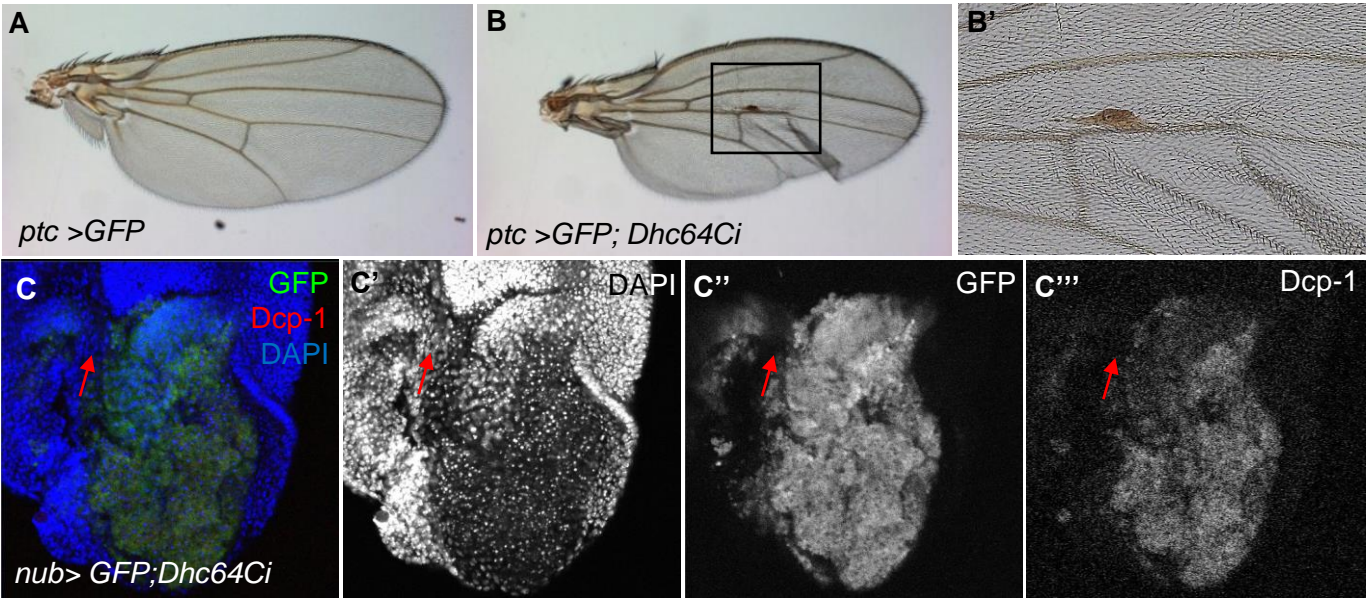

**Figure S1. Dhc64C is important for cell survival**

**(A, B)** Knockdown of *Dhc64C* by *ptc-Gal4* at 22°C resulted in uneven growth and reduction of the wing area between L3 and L4 veins (E, black box). High magnification in (B') shows defects in tissue polarity.

**(C)** Knockdown of *Dhc64C* in wing discs by *nub-Gal4* at 25°C resulted in abnormal morphology and cell death detected by *Drosophila* caspase-1 (Dcp-1). Red arrows indicate some GFP negative cells in between wing pouch and hinge regions that are not apoptotic.

Fig S2. (Kim and Orkhon et al)

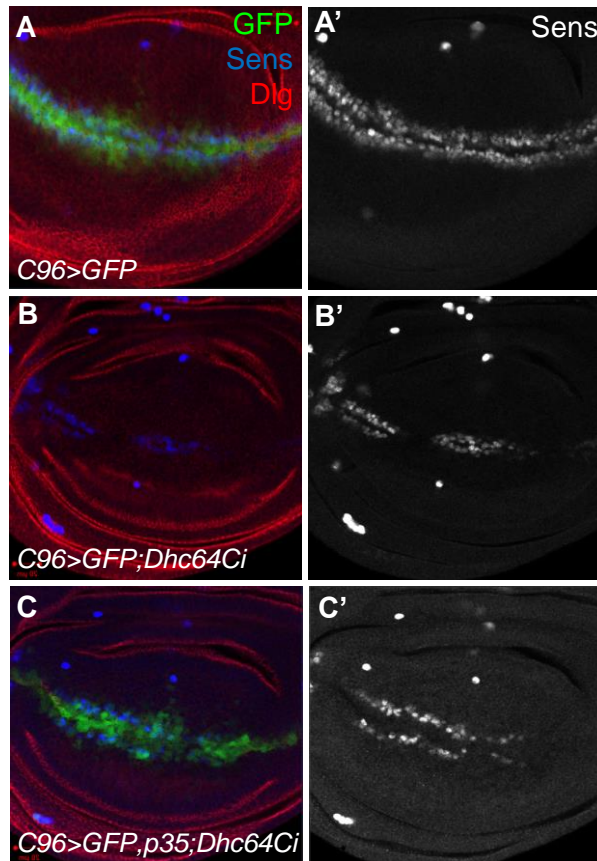

**Fig S2. Knockdown of Dhc64C reduces the expression level of Sens, which is partially rescued by coexpression of p35**

**(A-C)** Knockdown of Dhc64C by *C96-Gal4* reduced the level of Sens (B, B') compared to control *C96-Gal4>GFP* (A, A'). Co-expression of *Dhc64C RNAi* with *p35* partially rescued Sens expression (C, C').



Fig S3. (Kim and Orkhon et al)

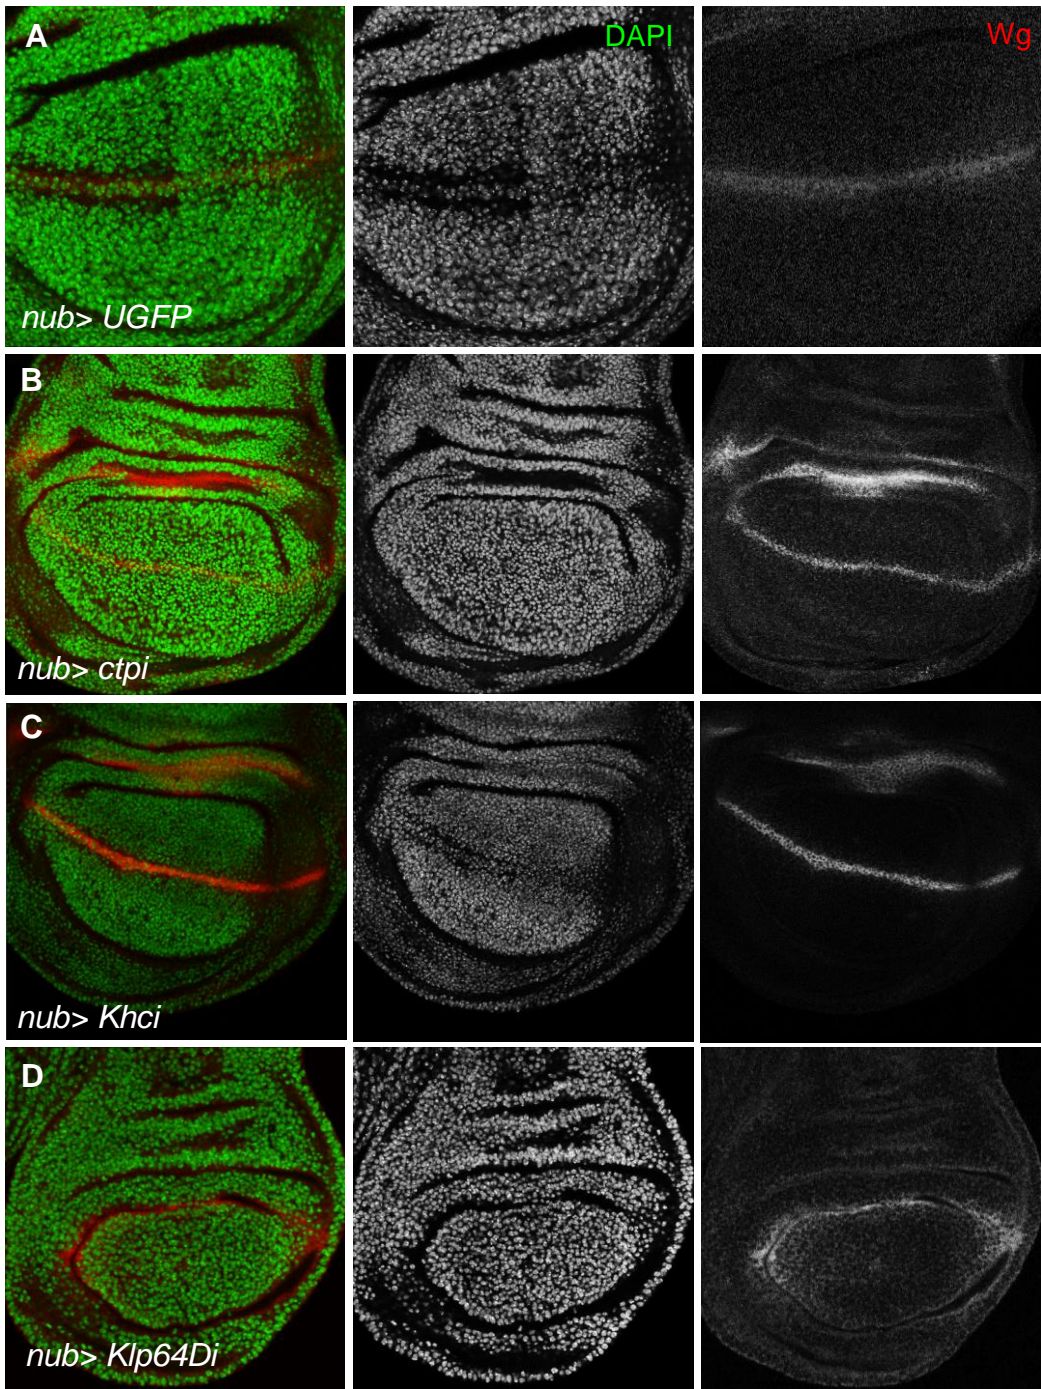

**Fig. S3. Subunits in Dynein and Kinesin microtubule motors do not induce overproliferation of Wg-producing cells**

Genotypes are written at lower left, and CC3 and Wg are visualized in A'-E' and A''-E'', respectively. The control *nub>GFP* wing disc (A) and wing discs with knockdown of Dhc64C (B), *ctp* (C), *Khc* (D), *Klp64D* (E) show differences in the level of Wg and CC3.

Fig S4. (Kim and Orkhon et al)

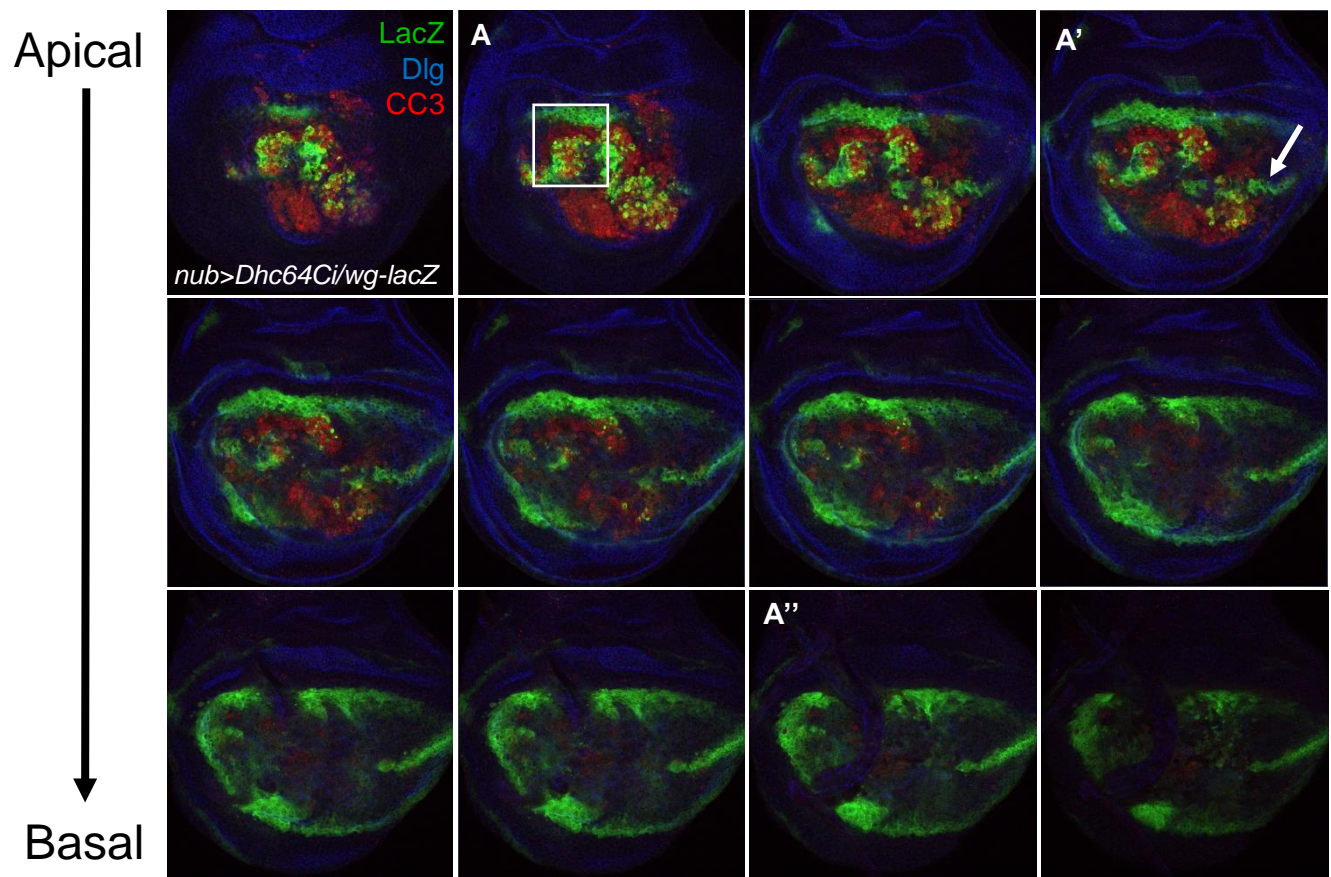

**Fig S4. The Wg-LacZ cells in the apical region are apoptotic unlike the Wg-LacZ cells in the basal region**

The Z-stack images of a wing disc shown in Fig. 5B, C and D. Wing discs of *nub>Dhc64Ci/wg-lacZ* flies are stained for LacZ, Discs-large (Dlg), and CC3. A , A' and A'' are same as Fig. 5C, 5B, and 5D, respectively.
